# Supplementary material for: Revealing the contribution of singlet oxygen in the photoelectrochemical oxidation of benzyl alcohol
Source: Royal Society of Chemistry journal article supplement (doi:10.1039/d0se01322f), 2020-12-29
Supplement: d0se01322f1.pdf [file d0se01322f1.pdf]

## Supporting information

### Unveiling the contribution of singlet oxygen in the photoelectrochemical oxidation of benzyl alcohol

Ramón Arcas, Eduardo Peris, Elena Mas-Marzá\* and Francisco Fabregat-Santiago\*

\*Corresponding authors

#### 1. Zr decorated BiVO<sub>4</sub> photoanodes characterization

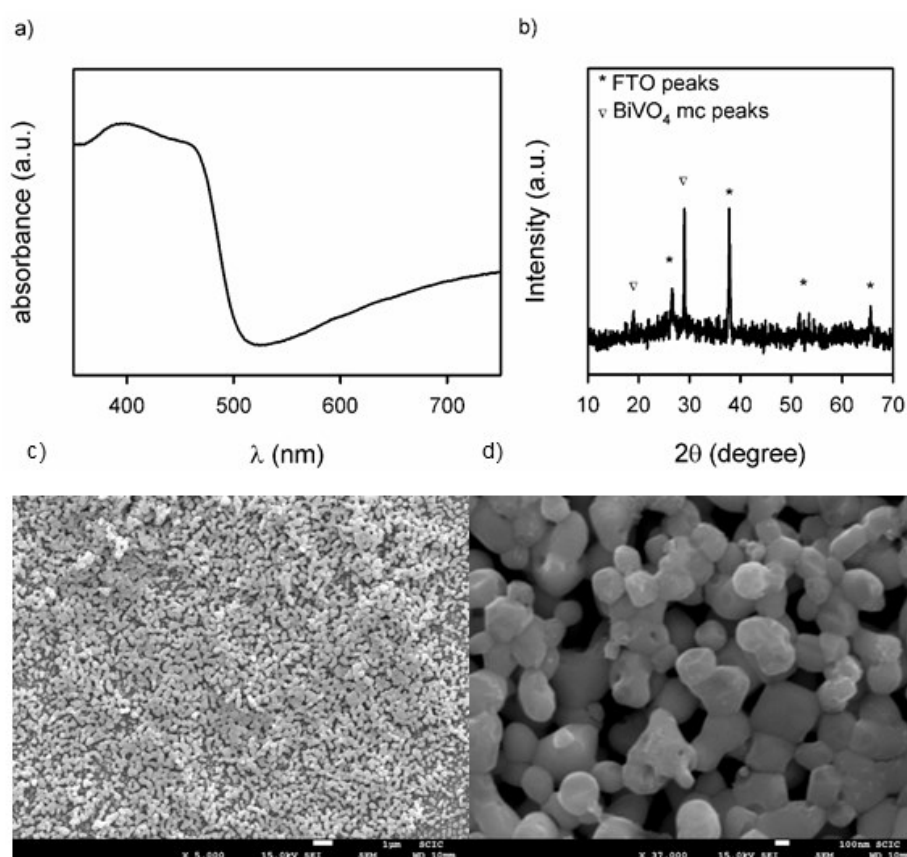

**Figure S1.** Optical and structural characterization of Zr decorated BiVO<sub>4</sub> photoanodes. a) UV-vis Absorption. b) XRD data. c) and d) SEM images.

## 2. Ferrocene/Ferrocenium (Fc/Fc<sup>+</sup>) couple used as an internal reference

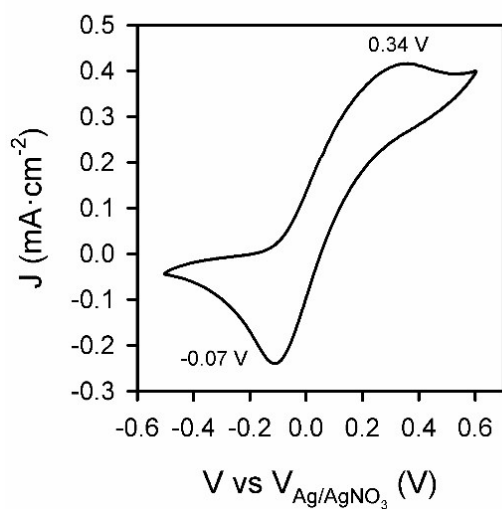

**Figure S2.** Cyclic voltammetry peak of Ferrocene/Ferrocenium (Fc/Fc<sup>+</sup>). 2mM of ferrocene was used to calibrate the voltage of the reference electrode. Conditions: 100 mM of benzyl alcohol (**1**), in 0.1 M TBAClO<sub>4</sub> in CH<sub>3</sub>CN, using Zr decorated BiVO<sub>4</sub> as WE, Pt film as CE, and Ag/AgNO<sub>3</sub> as RE.

### 3. Effect of water in photoelectrochemical measurements

The effect of water in the CV measurements is shown in Figure S3. Experimental conditions: cyclic voltammetry in 0.1 M TBAClO<sub>4</sub> CH<sub>3</sub>CN solution, Zr decorated BiVO<sub>4</sub> as WE, Pt as CE and Ag/AgNO<sub>3</sub> as RE, illumination with an ozone-free Xe lamp 100 mW·cm<sup>-2</sup>. In dry condition the solvent was dried, TBAClO<sub>4</sub> was dried by heating at 80°C for 2 days and Zr decorated BiVO<sub>4</sub> was pre-heated at 300°C for 6 days. In not dried condition, the solvent and TBAClO<sub>4</sub> were obtained from ambient conditions, without previous treatment, and the Zr decorated BiVO<sub>4</sub> was the same sample used previously under dry condition. In not dried conditions there is an increase of the photocurrent due to the oxidation of water.

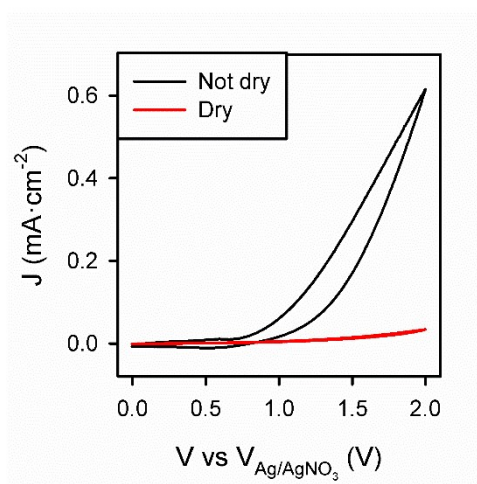

**Figure S3.** Cyclic voltammetry measurements, humid and dried electrolyte (black and red line, respectively).

#### 4. Electrocatalytic oxidation of benzyl alcohol (**1**) with Pt and BiVO<sub>4</sub> electrodes in dark

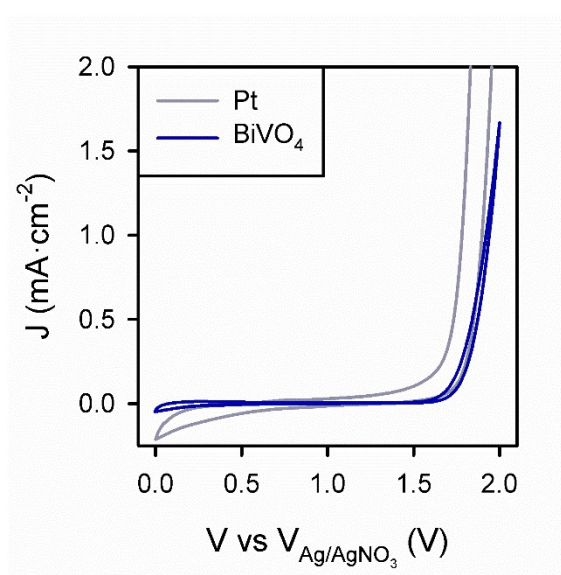

**Figure S4.** Cyclic voltammetry, of (**1**), using Pt (grey) or Zr decorated BiVO<sub>4</sub> (blue) as WE electrodes in the dark. The photoelectrode response for the oxidation of **1** is not so far from the one obtained using Pt as WE. Conditions: 100 mM of **1**, in 0.1 M TBAClO<sub>4</sub> in CH<sub>3</sub>CN, using Pt film as CE and Ag/AgNO<sub>3</sub> as RE.

## 5. Detection and quantification of H<sub>2</sub>O<sub>2</sub>

Detection and quantification of H<sub>2</sub>O<sub>2</sub> were done by <sup>1</sup>H NMR. The signal of H<sub>2</sub>O<sub>2</sub> in the <sup>1</sup>H NMR spectrum of the chronoamperometry experiments was assigned by comparison with the signal of pure H<sub>2</sub>O<sub>2</sub> in the same deuterated solvent. The quantification was done using anisole as an integration reference standard.

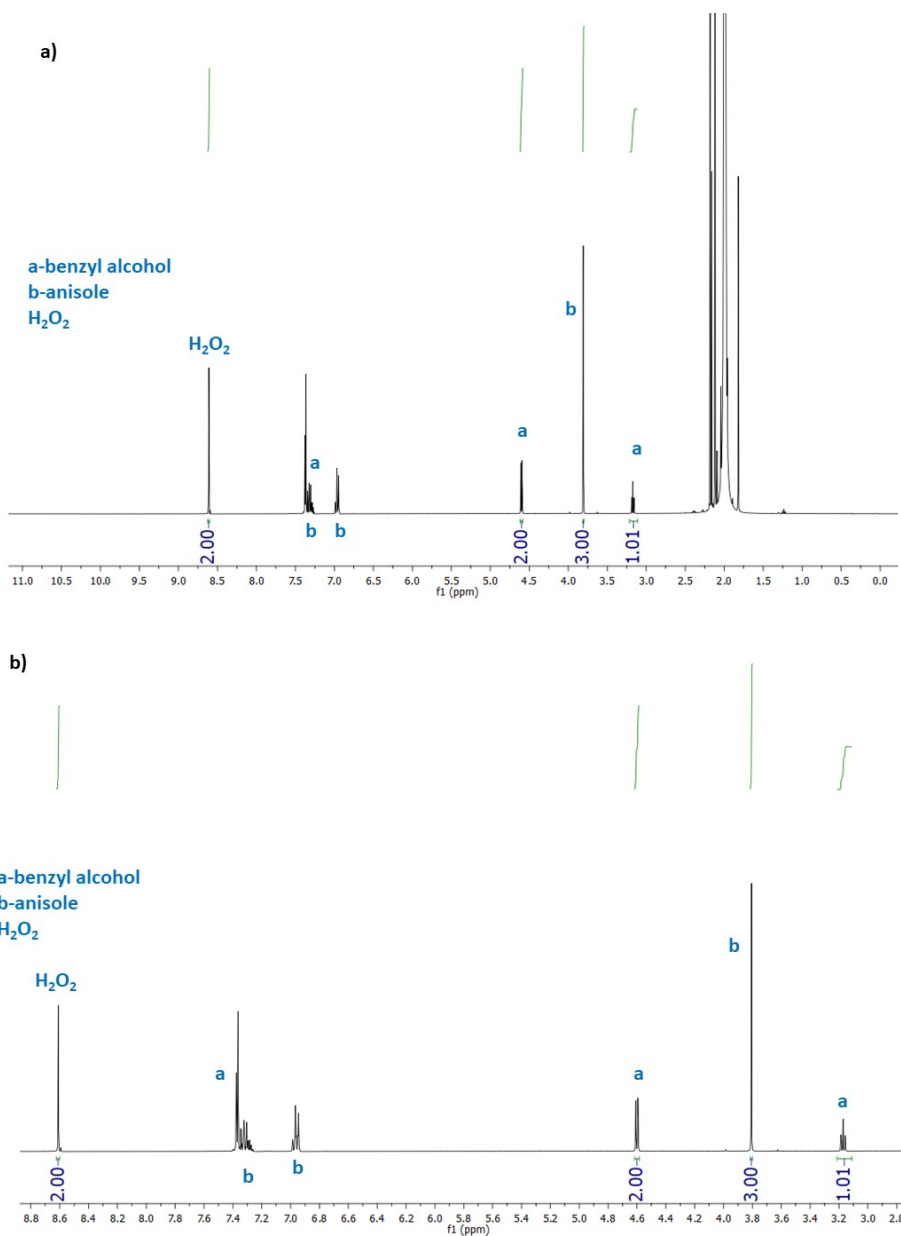

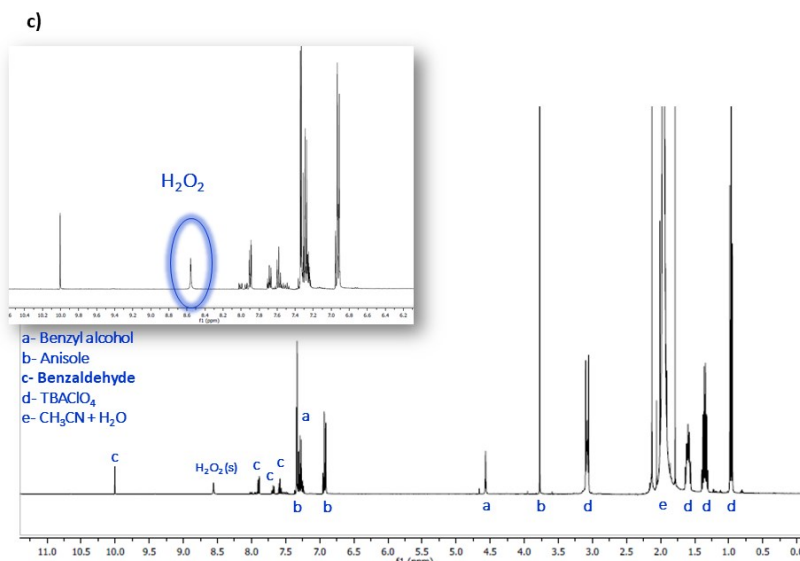

**Figure S5.** a) and b) <sup>1</sup>H NMR of H<sub>2</sub>O<sub>2</sub>, benzyl alcohol and anisole, in a molar ratio 1:1:1, in CD<sub>3</sub>CN. From this data, it can clearly be observed the signal for H<sub>2</sub>O<sub>2</sub>, and its integration using anisole as an integration reference standard; c) <sup>1</sup>H NMR of a chronoamperometry experiment at V<sub>oc</sub>, where H<sub>2</sub>O<sub>2</sub> can be detected and quantified.

## 6. Cyclic voltammetry of benzyl alcohol (1) using Zr decorated BiVO<sub>4</sub> as WE under visible light

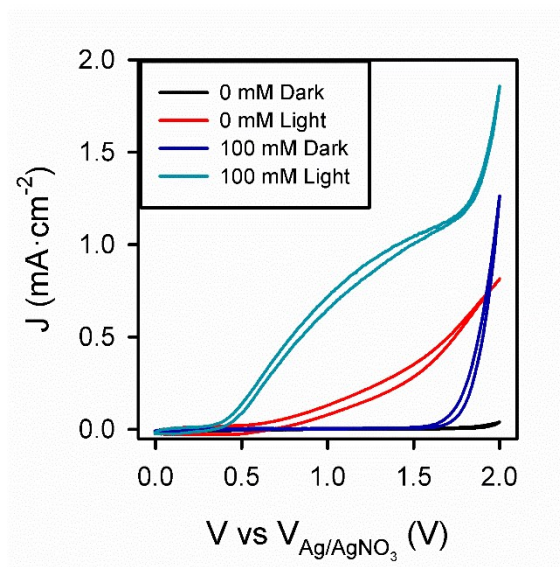

**Figure S6** Cyclic voltammetry in dark or illuminating only with visible light, in the absence or presence of **1** (100 mM), in 0.1 M TBAClO<sub>4</sub> in CH<sub>3</sub>CN, using Zr decorated BiVO<sub>4</sub> as WE, Pt film as CE and Ag/AgNO<sub>3</sub> as RE,

### 7. Effect of atmosphere, light and DABCO, a $^1\text{O}_2$ quencher, in anthracene and **1** solution under illumination

Solutions of anthracene or **1** illuminated with different light conditions under different atmospheres, in the presence or absence of DABCO as  $^1\text{O}_2$  quencher. The reactions do not occur in the absence of UV light,  $\text{O}_2$  or under the presence of DABCO.

**Table S1.** The reaction of solutions of anthracene or **1** under different conditions

| Entry                | Substrate  | Light conditions | Atmosphere   | DABCO | Conversion <sup>a</sup> |
|----------------------|------------|------------------|--------------|-------|-------------------------|
| <b>1</b>             | anthracene | UV               | $\text{O}_2$ | ×     | ✓                       |
| <b>2</b>             | anthracene | vis              | $\text{O}_2$ | ×     | very low                |
| <b>3</b>             | anthracene | UV               | $\text{N}_2$ | ×     | ×                       |
| <b>4</b>             | anthracene | UV               | $\text{O}_2$ | ✓     | ×                       |
| <b>5<sup>b</sup></b> | <b>1</b>   | UV               | $\text{N}_2$ | ×     | ×                       |
| <b>6<sup>b</sup></b> | <b>1</b>   | vis              | $\text{O}_2$ | ×     | ×                       |
| <b>7<sup>b</sup></b> | <b>1</b>   | UV               | $\text{O}_2$ | ✓     | ×                       |

Reaction conditions: 3 mM of the substrate in 2 mL of  $\text{CD}_3\text{CN}$ , during 30 min. DABCO added in a 1:1 molar ratio with respect to the substrate. <sup>a</sup> $^1\text{H}$  NMR conversion. <sup>b</sup>100 mM of the substrate in 15 mL of  $\text{CH}_3\text{CN}$ .
